# Supplementary material for: Improving microbial fitness in the mammalian gut by in vivo temporal functional metagenomics
Source: PubMed Central journal article supplement (PMC4380924; doi:10.15252/msb.20145866), 2015-03-11
Supplement: MSB-11-788-s008.pdf [file MSB-11-788-s008.pdf]

# % of mapped bases

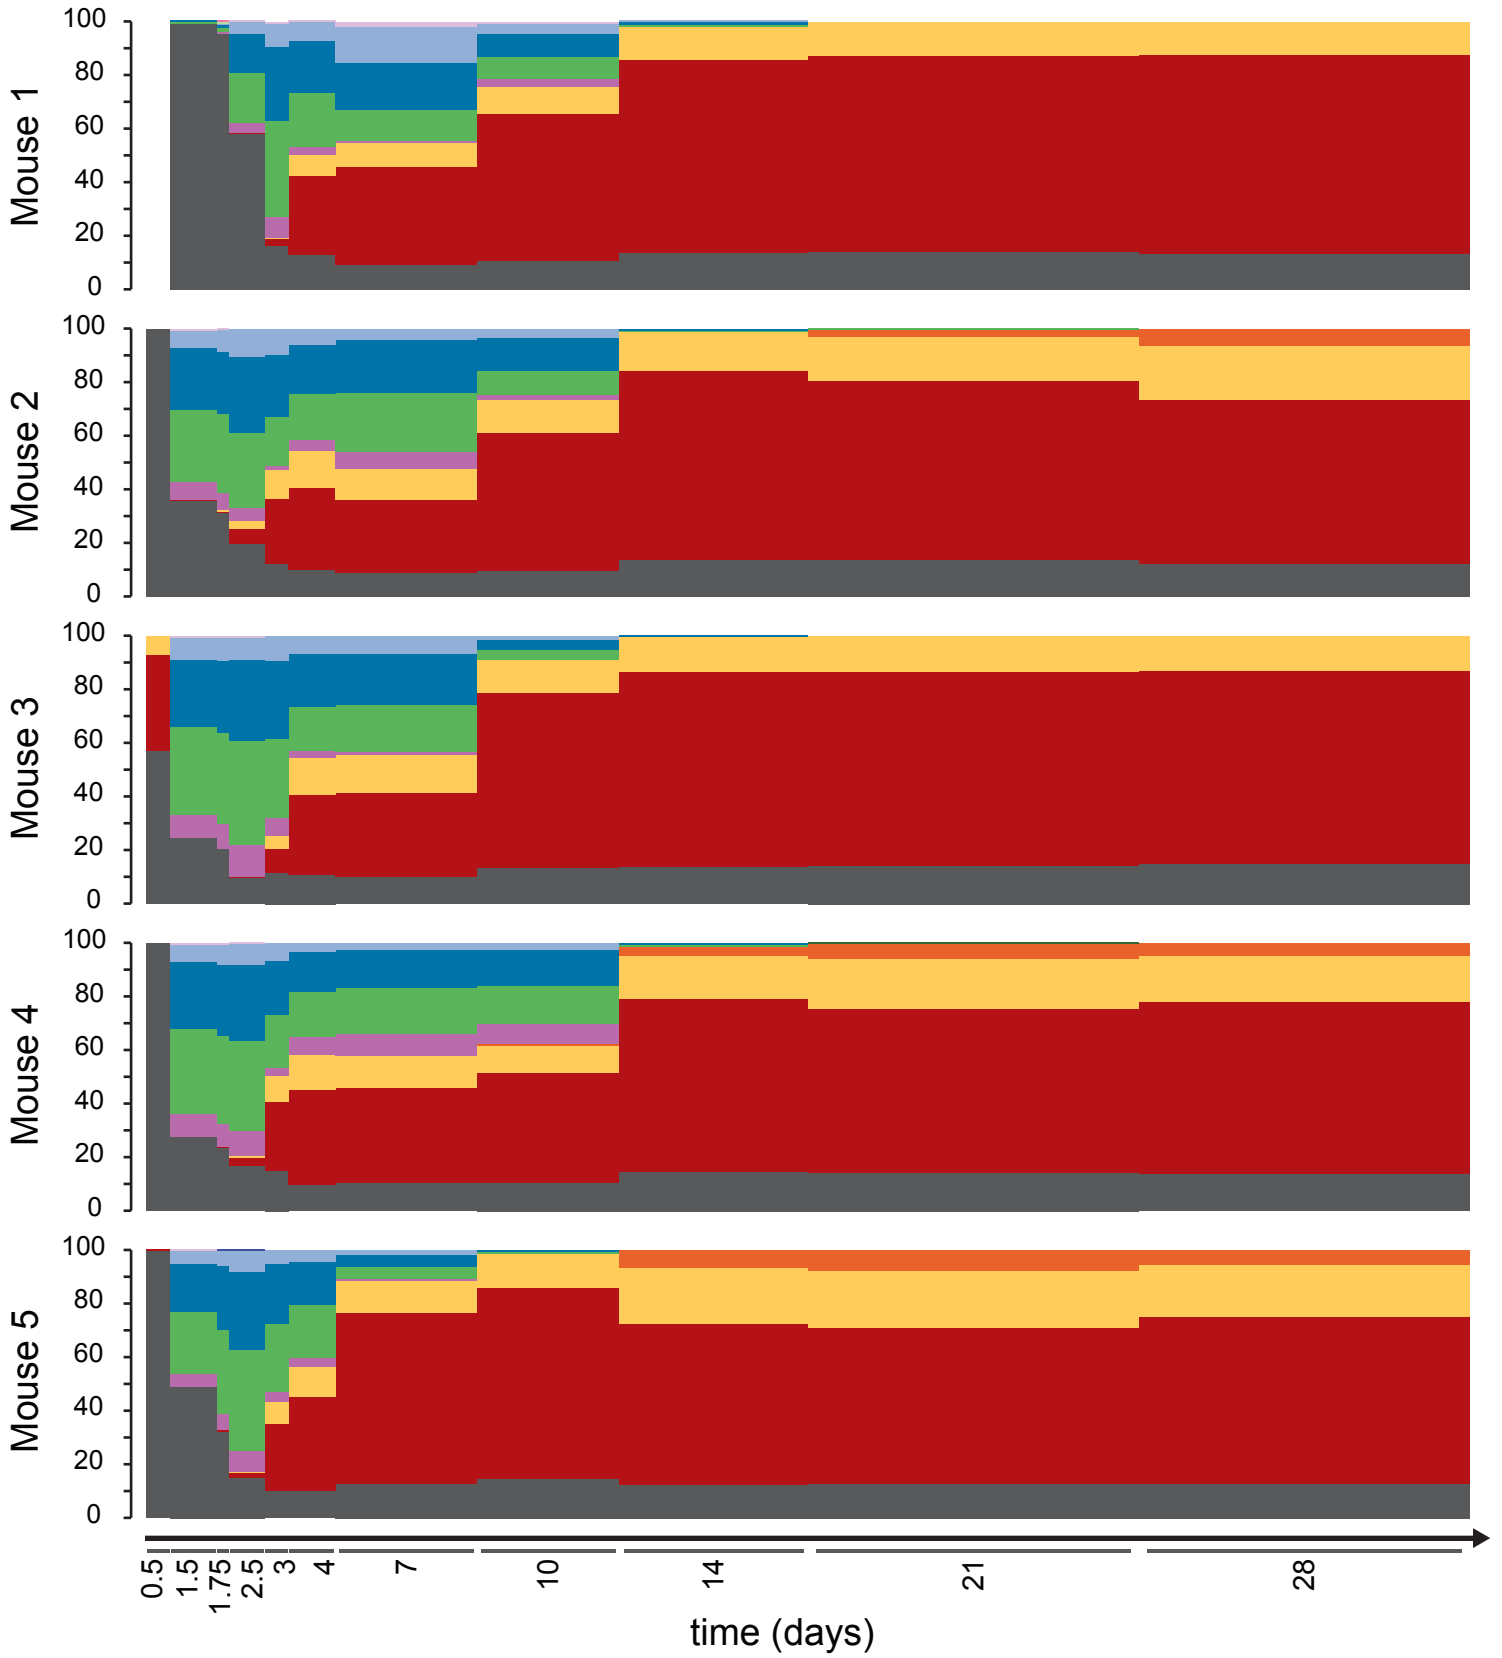

- |                                       |                                                    |                                         |
|---------------------------------------|----------------------------------------------------|-----------------------------------------|
| BT_0368 alpha-L-arabinofuranosidase   | BT_1757 fructokinase                               | BT_2324 DNA topoisomerase III (Mouse 1) |
| BT_0369 endo-1,4-beta-xylanase        | BT_1758 glucose/galactose transporter              | BT_2326 DNA methylase (Mouse 1)         |
| BT_0370 galactokinase                 | BT_1759 glycoside hydrolase                        | BT_1756 transposase (Mouse 4)           |
| BT_0371 glucose/galactose transporter | Other genes (each <0.2%)<br>and intergenic regions | BT_3599 beta-mannosidase (Mouse 5)      |
| BT_0372 aldose 1-epimerase            |                                                    |                                         |
